# Supplementary material for: Von Willebrand Factor Mediates Pneumococcal Aggregation and Adhesion in Blood Flow
Source: PubMed Central journal article supplement (PMC6443961; doi:10.3389/fmicb.2019.00511), 2019-03-26
Supplement: Table_1.pdf [file Table_1.pdf]

## Supplementary Table S1

**Table S1.** Data of surface plasmon resonance kinetics fitted to the 1:1 Langmuir binding model.

| Analyte, kinetic | $k_a$ [1/ms]       | $k_d$ [1/s]           | $K_D$ [M]              | $R_{max}$ [RU] | $\chi^2$ |
|------------------|--------------------|-----------------------|------------------------|----------------|----------|
| vWF, Kinetic 1   | $2.55 \times 10^5$ | $1.24 \times 10^{-3}$ | $4.85 \times 10^{-9}$  | 123.6          | 1.53     |
| vWF, Kinetic 2   | $2.37 \times 10^5$ | $1.40 \times 10^{-3}$ | $5.91 \times 10^{-10}$ | 122.4          | 1.53     |
| A1, Kinetic 1    | $2.22 \times 10^6$ | $1.30 \times 10^{-3}$ | $5.85 \times 10^{-10}$ | 60.2           | 4.01     |
| A1, Kinetic 2    | $5.97 \times 10^5$ | $1.26 \times 10^{-3}$ | $2.184 \times 10^{-9}$ | 60.17          | 1.79     |
| A1, Kinetic 3    | $9.77 \times 10^5$ | $1.75 \times 10^{-3}$ | $1.79 \times 10^{-9}$  | 57.09          | 1.4      |
