# Supplementary material for: Von Willebrand Factor Mediates Pneumococcal Aggregation and Adhesion in Blood Flow
Source: PubMed Central journal article supplement (PMC6443961; doi:10.3389/fmicb.2019.00511), 2019-03-26
Supplement: Table_2.pdf [file Table_2.pdf]

## Supplementary Table S2

**Table S2. Amino acid sequence comparison of the putative VWF binding site from different pathogenic bacteria and commensals.**

|                                                 | Acc. No. (UniProtKB) | identities [protein] in % | peptide sequence of putative VWF-binding site                                                             |
|-------------------------------------------------|----------------------|---------------------------|-----------------------------------------------------------------------------------------------------------|
| <i>S. pneumoniae</i> serotype 2 (D39)           | Q04KG2 (ENO_STRP2)   |                           | <sup>185</sup> G A P T F K E A L R Y G A E I F H A L K K I L K S R G L E T A V G D E G G P <sup>223</sup> |
| <i>S. pneumoniae</i> (R6)                       | Q8DPS0 (ENO_STRR6)   | <b>100</b>                | . . . . .                                                                                                 |
| <i>S. aureus</i> (NCTC 8325)                    | Q2G028 (ENO_STAA8)   | <b>94</b>                 | . . T . . . . S . . W . . T . . . . N . . S . . S K . . . . .                                             |
| <i>L. plantarum</i> (CRL 1506)                  | KRU20356.1           | <b>50</b>                 | E R T S . R D G F E K I V N T Y . T . . . V I E D A . Y I . G L . . . . .                                 |
| <i>B. animalis</i> subsp. <i>lactis</i> (AD011) | B8DTI9 (ENO_BIFA0)   | <b>56</b>                 | . F Q . Y S . . . Q A . V . V Y . T . . N V . . K Q . . A . G L . . . . .                                 |
| <i>E. coli</i> (K12)                            | P0A6P9 (ENO_ECOLI)   | <b>59</b>                 | . . K . V . . . I . M . S . V . . H . A . V . . A K . M N . . . . . Y                                     |
